# Supplementary material for: Persistent Cryptosporidium parvum Infection Leads to the Development of the Tumor Microenvironment in an Experimental Mouse Model: Results of a Microarray Approach
Source: MDPI journal article supplement (doi:10.3390/microorganisms9122569), 2021-12-12
Supplement: s1 [file s1]

**Table S1 - Primers used for RT-qPCR**

| <b>Gene ID</b> | <b>Primer bank ID</b> | <b>Primers</b> | <b>Sequences</b>               | <b>Product size (bp)</b> |
|----------------|-----------------------|----------------|--------------------------------|--------------------------|
| IIGP1          | 11140831a1            | F              | 5' CAGGACATCCGCCTTAAGTGT 3'    | 519                      |
|                |                       | R              | 5' AGGAAGTAAGTACCCATTAGCCA 3'  |                          |
| IDO1           | 6680346c2             | F              | 5' GCCTCCTATTCTGTCTTATGCAG 3'  | 194                      |
|                |                       | R              | 5' ATACAGTGGGGATTGCTTTGATT 3'  |                          |
| SPP1           | 6678113a1             | F              | 5' AGCAAGAAACTCTTCCAAGCAA 3'   | 134                      |
|                |                       | R              | 5' GTGAGATTTCGTCAGATTCATCCG 3' |                          |
| UBD            | 12963519a1            | F              | 5' CCAATGGCGGTTAATGACCTT 3'    | 141                      |
|                |                       | R              | 5' TTTCGATGGGGCTTGAGGATT 3'    |                          |
| DEFA1          | Ref.4                 | F              | 5' TCCTCCTCTCTGCCCTTGTC 3'     | 205                      |
|                |                       | R              | 5' CCTTGCAGCCTCTTGATCT 3'      |                          |
| DEFA3          | Ref.4                 | F              | 5' TAGTCCTCCTCTCTGCCCTC 3'     | 245                      |
|                |                       | R              | 5' ATGACCCTTTCTGCAGGTCC 3'     |                          |
| GAPDH          | 126012538c3           | F              | 5' TGGCCTTCCGTGTTTCCTAC 3'     | 178                      |
|                |                       | R              | 5' GAGTTGCTGTTGAAGTCGCA 3'     |                          |
